# Supplementary material
Source: PubMed Central journal article supplement (PMC3583997)
Supplement: 3c7659a34dfa77368410a36c2705bf12_genetics.112.147561-5.pdf [file 3c7659a34dfa77368410a36c2705bf12_genetics.112.147561-5.pdf]

**Table S1 Genetic stocks used in this study**

| Line                                  | Notes on genotype                                                                                                                                                        | Source      | Reference                                                        |
|---------------------------------------|--------------------------------------------------------------------------------------------------------------------------------------------------------------------------|-------------|------------------------------------------------------------------|
| <b>HR stocks</b>                      |                                                                                                                                                                          |             |                                                                  |
| <i>y w; FLP-I-Scel/TM6</i>            | $y^1 w^*$ ; $P\{ry^{+17.2}=70FLP\}11 P\{v^{+11.8}=70I - Scel\}2B noc^{ScO}/CyO, S^2$                                                                                     | BSC 6930    | Staber <i>et al.</i> 2011                                        |
| <i>y w ey-FLP</i>                     | $y^{02} w^{1118} P\{ry[+t7.2]=ey-FLP.N\}2$                                                                                                                               | BSC 5580    | Staber <i>et al.</i> 2011                                        |
| <i>y w Cre; noc<sup>ScO</sup>/CyO</i> | $y^1 w^{67c23} P\{y^{+mbDint2}=Crey\}1b;$<br>$noc^{ScO}/CyO$                                                                                                             | BSC 766     | Staber <i>et al.</i> 2011                                        |
| $w^1$                                 |                                                                                                                                                                          | BSC 145     | Staber <i>et al.</i> 2011                                        |
| $w^{1118}$                            |                                                                                                                                                                          | BSC 3605    | Staber <i>et al.</i> 2011                                        |
| <b>Balancer Stocks</b>                |                                                                                                                                                                          |             |                                                                  |
| <i>w; TM3 sb /TM6 tb</i>              |                                                                                                                                                                          | B. Ganetzky |                                                                  |
| <i>+</i> ; $CyO^{It\ ap\ pr\ cn}/ScO$ |                                                                                                                                                                          | B. Ganetzky |                                                                  |
| <i>w</i> ; $CyO^{cn\ bw\ Roi}/ScO$    |                                                                                                                                                                          | B. Ganetzky |                                                                  |
| <b>SD Stocks</b>                      |                                                                                                                                                                          |             |                                                                  |
| <i>SD-5</i>                           | Strong distortion phenotype and contains <i>Sd</i> , <i>E(SD)</i> , <i>Rsp<sup>i</sup></i> , <i>M(SD)</i> and <i>St(SD)</i> as well as two paracentric inversions on 2R. | B. Ganetzky | <i>Sandler and Hiraizumi 1959;</i><br><i>Sandler et al. 1959</i> |
| <i>SD-5*</i>                          | Uncharacterized derivative of <i>SD-5*</i> which exhibits an intermediate level of distortion                                                                            | B. Ganetzky |                                                                  |
| <i>SD-72</i>                          | Strong distorter with a both pericentric and paracentric inversions                                                                                                      | B. Ganetzky | Sandler and Hiraizumi 1959)                                      |
| <i>SD-Mad It cn</i>                   | Derived from the original <i>SD-Mad</i> by recombination with chromosomes carrying the recessive markers <i>cn</i> , <i>It</i>                                           | B. Ganetzky | R.G. Temin 1979                                                  |
| <i>SD-Mad bw<sup>3</sup></i>          | Derived from the original <i>SD-Mad</i> by recombination with chromosomes carrying the recessive markers <i>bw<sup>3</sup></i>                                           | B. Ganetzky | R.G. Temin 1979                                                  |
| <i>SD-Roma</i>                        | Inversion free moderately distorting SD chromosome isolated in Italy                                                                                                     | B. Ganetzky | Nicoletti and Trippa 1967)                                       |
| <i>SD-Los Arrenos</i>                 | Weak distorter                                                                                                                                                           | B. Ganetzky |                                                                  |
| <i>Rsp<sup>S</sup> cn bw</i>          | $[Sd^+, E(SD)^+, Rsp^S]$ standard Rsp sensitive chromosome                                                                                                               | B. Ganetzky | Lyttle 1991                                                      |
| <i>Rsp<sup>i16</sup> cn bw</i>        | $[Sd^+ E(SD)^+ Rsp^i]$ Radiation-induced derivative of the Rsp <sup>s</sup> cn bw chromosome where the Rsp locus has                                                     | B. Ganetzky | Ganetzky 1977                                                    |

|                                               |                                                                                             |              |                              |
|-----------------------------------------------|---------------------------------------------------------------------------------------------|--------------|------------------------------|
|                                               | been completely deleted                                                                     |              |                              |
| <i>Rsp<sup>SS</sup> It pk cn</i>              | [ <i>Sd<sup>r</sup> E(SD)<sup>r</sup> Rsp<sup>SS</sup></i> ] the canonical RspSS chromosome | B. Ganetzky  | Lyttle 1991                  |
| <b>RNAi Mutants</b>                           |                                                                                             |              |                              |
| <i>aub<sup>CC42</sup> cn bw/CyO</i>           | EMS; Strong allele                                                                          | T. Schüpbach | Schupbach and Wieschaus 1991 |
| <i>aub<sup>HN2</sup> cn bw/CyO</i>            | EMS; Strong allele                                                                          | T. Schüpbach | Schupbach and Wieschaus 1991 |
| <i>aub<sup>HM23</sup> cn bw/CyO</i>           | EMS; Strong allele                                                                          | T. Schüpbach | Schupbach and Wieschaus 1991 |
| <i>aub<sup>AHN56</sup> cn bw/CyO</i>          | EMS: Strong allele, has secondary mutation                                                  | T. Schüpbach | Schupbach and Wieschaus 1991 |
| <i>aub<sup>AHE13</sup> cn bw/CyO</i>          | EMS: Strong allele, has secondary mutation                                                  | T. Schüpbach | Schupbach and Wieschaus 1991 |
| <i>zuc<sup>HM27</sup> cn bw/CyO</i>           | EMS: Strong allele                                                                          | T. Schüpbach | Schupbach and Wieschaus 1991 |
| <i>zuc<sup>SG63,rec2</sup> pr c px sp/CyO</i> | EMS: homozygotes poorly viable                                                              | T. Schüpbach | Schupbach and Wieschaus 1991 |
| <i>squ<sup>PP32</sup> cn bw/CyO</i>           | EMS; Strong allele                                                                          | T. Schüpbach | Schupbach and Wieschaus 1991 |
| <i>squ<sup>HE47</sup> cn bw/CyO</i>           | EMS; Strong allele                                                                          | T. Schüpbach | Schupbach and Wieschaus 1991 |
| <i>cuff<sup>WM25</sup> cn bw/CyO</i>          | EMS; Strong allele                                                                          | T. Schüpbach | Schupbach and Wieschaus 1991 |
| <i>cuff<sup>Q037</sup> cn bw/CyO</i>          | EMS; Strong allele                                                                          | T. Schüpbach | Schupbach and Wieschaus 1991 |
| <i>w<sup>1</sup>; aub<sup>N11</sup>/CyO</i>   | 110bp deletion                                                                              | P. Macdonald | Harris and Macdonald 2001    |
| <i>piwi<sup>06843</sup> cn /CyO</i>           | P{PZ} in first exon                                                                         | BSC 12225    | Cox et al 1998               |
| nosGAL4, Aub-GFP                              | UAS-Aubergine-GFP recombined on to the same chromosome as nos-GAL4 VP16                     | P. Macdonald | Harris and Macdonald 2001    |
