# Supplementary material
Source: PubMed Central journal article supplement (PMC3583997)
Supplement: 7a791c24561ccd77058d7e97c284e487_genetics.112.147561-3.pdf [file 7a791c24561ccd77058d7e97c284e487_genetics.112.147561-3.pdf]

**Table S2 Primer sequences used in this study**

| <b>Name</b>                            | <b>Sequence</b>                                     |
|----------------------------------------|-----------------------------------------------------|
| <b>Cloning Primers</b>                 |                                                     |
| AUBarm1-F <i>Bs</i> WI                 | TCGTACGCTCTCCATGTAGCGAAAAGCGTATAG                   |
| AUBarm1-R <i>As</i> cl                 | TGGCGCGCCAATGCATATATTCGTATGAAATGAGC                 |
| AUBarm2-F <i>Acc</i> 65I               | TGGTACCTTCCAGCAACGGAACCTTTATAGAC                    |
| AUBarm2-R <i>Not</i> I                 | TGCGGCCGCTGGTTACGAAGAGTCGTGCTGGCG                   |
| <b>Sequencing Primers</b>              |                                                     |
| AUBarm1-s1                             | GTGACAGTCGCTGCCATCGTATTATTGG                        |
| AUBarm1-s2                             | CTGACAAGTGGACTGTCTGCAGTGGGTG                        |
| AUBarm1-s3                             | CTTTATATCGAAGGGTAAGTACATG                           |
| AUBarm1-s4                             | GA CT CGA ACG AT GA A G A A C A A C A C C A G C G   |
| AUBarm2-s1                             | GTAGCGAGAATTAATGCGCTTGGATAC                         |
| AUBarm2-s2                             | GTGTCACCACCTGCGATGGCACC GGTC                        |
| AUBarm2-s3                             | CCGGTGGCAACACGCGTGCTGGAATCTC                        |
| AUBarm2-s4                             | CGATTGAAAGTCGACATCGTCAATGCG                         |
| aub arm1-RS1                           | GGGCAACTCAAAAAGTGGTAACAAG                           |
| aub arm2-RS1                           | GATATATGTATGTAGATATGTACATC                          |
| AUBarm1-R3                             | CTTGTTTATTTACATGTAAGTACTGTCC                        |
| AUBarm1-R4                             | CCTGGTCAACCCCTTAAATGCAGATGC                         |
| AUBarm1-R5                             | GCTTAGTAAATAAGTTAACACAATTTAC                        |
| AUB HN1 VR                             | CCGCAACGGCACTTACTCCCAAGCG                           |
| <b>Mutagenic Primers</b>               |                                                     |
| AUB HN m1 F                            | GATGGGAGCTCCCTGGTAGGTAGTCATCCCCCTCCACGGTCTGA        |
| AUB HN m1 R                            | TCAGACCGTGGAGGGGGATGACTACCTACCAGGGAGCTCCCATC        |
| aub E721A R                            | GGTCAGCTCTACCAGGTGGTAAACAGCGCGGTGAACACCCTAAAGGACAGG |
| aub E721A F                            | CCTGTCCTTTAGGGTGTTACCGCGCTGTTTACCACCTGGTAGAGCTGACC  |
| <b>Arm Specific Validation Primers</b> |                                                     |
| AUBarm2-V1                             | CTTGATGAACATAAAGGGATCC                              |
| AUBarm2-V2                             | CGTCGATTTTACGCCTGATGTGG                             |
| AUBarm2-V3                             | GGCACTCATATTACCGTGCAGGC                             |
| AUBarm1-V1                             | GGTTTATAATTCCACGGACTTC                              |
| AUBarm1-V2                             | CCATAGCGAATGTAGTGTG                                 |
| AUBarm1-V3                             | CCCGGACCATCGAAAGTAACTGC                             |
| AUBarm2-VR2                            | CGGTGAACATGGCGTGCGCCCTGAGG                          |
| AUBarm1-R3                             | CTTGTTTATTTACATGTAAGTACTGTCC                        |
| AUBarm1-R4                             | CCTGGTCAACCCCTTAAATGCAGATGC                         |
| AUBarm1-R5                             | GCTTAGTAAATAAGTTAACACAATTTAC                        |

| <b>p[W25.2] Specific Validation Primers</b> |                                                                                                                                                                                                                                                                                                                                                                                                                                                                                                                                                                                                                                                                                                                                    |
|---------------------------------------------|------------------------------------------------------------------------------------------------------------------------------------------------------------------------------------------------------------------------------------------------------------------------------------------------------------------------------------------------------------------------------------------------------------------------------------------------------------------------------------------------------------------------------------------------------------------------------------------------------------------------------------------------------------------------------------------------------------------------------------|
| pW-Not 1                                    | CACTGTTACGTCGCACTCGAGGGTAC                                                                                                                                                                                                                                                                                                                                                                                                                                                                                                                                                                                                                                                                                                         |
| pW-Not 2                                    | GCACTCGAGAGCTCGTTACAGTCCG                                                                                                                                                                                                                                                                                                                                                                                                                                                                                                                                                                                                                                                                                                          |
| pW-Bsi 1                                    | CGCACCGGACTGTAACGAGCTAC                                                                                                                                                                                                                                                                                                                                                                                                                                                                                                                                                                                                                                                                                                            |
| pW-Bsi 2                                    | GGCGACTCAACGCAGATGCCGTACC                                                                                                                                                                                                                                                                                                                                                                                                                                                                                                                                                                                                                                                                                                          |
| pW-Asc 1                                    | GTATGCTATACGAAGTTATCTAGACTAGTCTAGGGCG                                                                                                                                                                                                                                                                                                                                                                                                                                                                                                                                                                                                                                                                                              |
| pW-Asc 2                                    | GCTTGGCTGCAGGTCGACTCTAGAGG                                                                                                                                                                                                                                                                                                                                                                                                                                                                                                                                                                                                                                                                                                         |
| pW-Asc 3                                    | CGATCATTATTTCGCTGCATGAATTAGC                                                                                                                                                                                                                                                                                                                                                                                                                                                                                                                                                                                                                                                                                                       |
| pW-Acc 1                                    | CATTATACGAAGTTATCTAGACTAGTCTAGGGTAC                                                                                                                                                                                                                                                                                                                                                                                                                                                                                                                                                                                                                                                                                                |
| pW-Acc 2                                    | GACGCTCCGTCGACGAAGCGCTC                                                                                                                                                                                                                                                                                                                                                                                                                                                                                                                                                                                                                                                                                                            |
| pW-Acc 3                                    | GCTCAGCTTGCTTCGCGATGTGTTAC                                                                                                                                                                                                                                                                                                                                                                                                                                                                                                                                                                                                                                                                                                         |
| WTPR                                        | CGCGAACATTTCGAGGCGCGCTCTCTCG                                                                                                                                                                                                                                                                                                                                                                                                                                                                                                                                                                                                                                                                                                       |
| Wt SQ10F                                    | GTGACCTGTTCCGGAGTGATTAGCG                                                                                                                                                                                                                                                                                                                                                                                                                                                                                                                                                                                                                                                                                                          |
| <b>Southern Blotting</b>                    |                                                                                                                                                                                                                                                                                                                                                                                                                                                                                                                                                                                                                                                                                                                                    |
| SP6                                         | GCCAAGCTATTTAGGTGACACTATAG                                                                                                                                                                                                                                                                                                                                                                                                                                                                                                                                                                                                                                                                                                         |
| T7                                          | GAATTGTAATACGACTCACTATAGGG                                                                                                                                                                                                                                                                                                                                                                                                                                                                                                                                                                                                                                                                                                         |
| Rsp13 clone sequence                        | GGAGCTCCACCGCGGTGGCGGCCGGCCCTGCAGATCTGCGGCCGCTCTAGAAGGTGTCTTCTGTTGCGCT<br>GGTACTTGAAATCGAAAAATCACTCATTGACCGCTAAAATGACATAACTTAGTCAATTTATTGTTTTGTG<br>TACCAGGTTTAAATAATCTGTAGAAGGTATCTTCTGTTTGTCTGGTACTTGAAATCGGAAAATCACTCATT<br>TGACCGCTTAAAATGTA AAACTTAGGCAATTTACTGTTTTTCTTACCAGTTGAACAGAATCTCTAGAAGG<br>TGTTCTTCTGTTGCGCTGGTACTTGAAATCGAAAAATCACTCATTGACCGCTAAAATGACATAACTTAGTCA<br>ATTTATTGTTTTGTGTACCAGGTTTAAATAATCTGTAGAAGGTATCTTCTGTTTGTCTGGTACTTGAAATC<br>GGAAAATCACTCATTGACCGCTTAAAATGTA AAACTTAGGCAATTTACTGTTTTTCTTACCAGTTGAAC<br>AGAATCTCTAGAACTAGTGGATCCCCGGGCTGCAGGAATTCGATATCAAGCTTATCGATACCGTCGACC<br>TCGAGGGGGGGCCCGGTACCAGCTTTTGTCCCTTTAGTGAGGGTTAATTCGAGCTTGGCGTAATCATG<br>GTCATAGCTGTTTCTGTGTGAAATTGTTATCCGCTCAC |
