# Supplementary material
Source: PubMed Central journal article supplement (PMC3583997)
Supplement: 7cbba80733443dc706cdeaf85cd033ae_genetics.112.147561-2.pdf [file 7cbba80733443dc706cdeaf85cd033ae_genetics.112.147561-2.pdf]

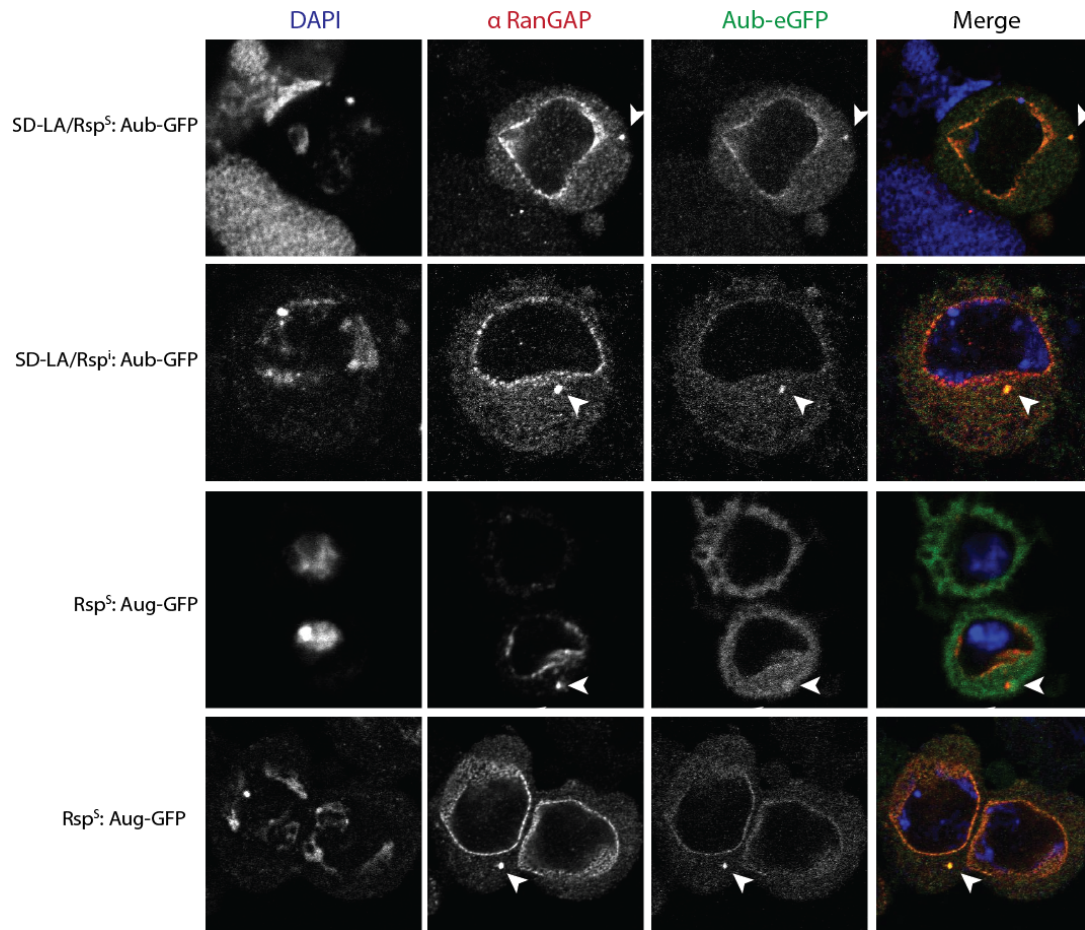

**Figure S2** Aub-GFP and RanGAP colocalized in a single large body of primary spermatocytes. Whole mount testis of males expressing Aub-GFP were fixed with paraformaldehyde and stained with anti-RanGAP (1:1000) primary and Alexa Fluor (1:800) secondary antibodies. Confocal imaging was done on a Zeiss LSM 510. Spermatocytes in the testis of both distorting (*SD-LA/Rsp<sup>5</sup>*) and non-distorting (*SD<sup>+</sup> Rsp<sup>5</sup>*) males show a single large point of colocalization between Aub-GFP and Ran-GAP (arrowhead)
