# Supplementary material
Source: PubMed Central journal article supplement (PMC3583997)
Supplement: 87632269d147205dfa411c597982077e_genetics.112.147561-4.pdf [file 87632269d147205dfa411c597982077e_genetics.112.147561-4.pdf]

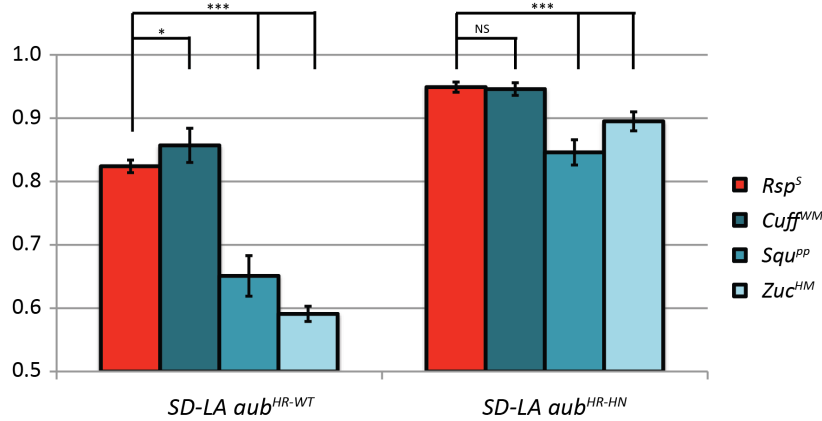

**Figure S1** Chromosomes carrying *zuc*<sup>HM</sup> and *squ*<sup>PP</sup> suppress distortion by SD-LA in both *aub*<sup>HR-wt</sup> and *aub*<sup>HR-HN</sup> backgrounds. Females of the genotype SD-LA *aub*<sup>HR-wt</sup> and *aub*<sup>HR-HN</sup> were crossed with males carrying either a mutation in either *zuc*, *cuff* or *squ*. The 15-30 individual male F1 were then backcrossed to *cn bw* females to test for distortion. The *squ*<sup>PP</sup> and *zuc*<sup>HM</sup> chromosomes significantly suppressed distortion when paired with either the *aub*<sup>HR-HN</sup> or *aub*<sup>HR-wt</sup> chromosome. The *cuff*<sup>MM</sup> chromosome gave a small but significant enhancement of distortion ( $p < 0.05$ ) with the wild type allele and there was no significant change with the *aub*<sup>HR-HN</sup> mutant (\*\* $p < 0.0005$ , \*  $p < 0.05$ , 2-tailed Z-test).
